# Supplementary material for: Pyridine-incorporated alcohol-soluble neutral polyfluorene derivatives as efficient cathode-modifying layers for polymer solar cells
Source: Royal Society of Chemistry journal article supplement (doi:10.1039/c7py01521f), 2017-01-01
Supplement: c7py01521f1.pdf [file c7py01521f1.pdf]

## Supporting Information

### Pyridine-Incorporated Alcohol-Soluble Neutral Polyfuorene Derivatives as Efficient Cathode-Modifying Layers for Polymer Solar Cells

Guiting Chen,<sup>†a, b</sup> Sha Liu,<sup>†a</sup> Zhicai He,<sup>a</sup> \* Hong-Bin Wu,<sup>a</sup> Wei Yang,<sup>a</sup> Bin Zhang,<sup>a, c\*</sup>  
Yong Cao<sup>a</sup>

<sup>a</sup> Institute of Polymer Optoelectronic Materials and Devices, State Key Laboratory of Luminescent Materials and Devices, South China University of Technology, Guangzhou, 510640, P. R. China. E-mail: msbzhang@scut.edu.cn; msangusyip@scut.edu.cn.

<sup>b</sup> School of Chemistry and Environment, Jiaying University, Meizhou 514015, P.R. China.

<sup>c</sup> College of Material Engineering, Fujian Agriculture and Forestry University, Fuzhou 350002, Fujian, P. R. China

<sup>†</sup> G. Chen and S. Liu contributed equally.

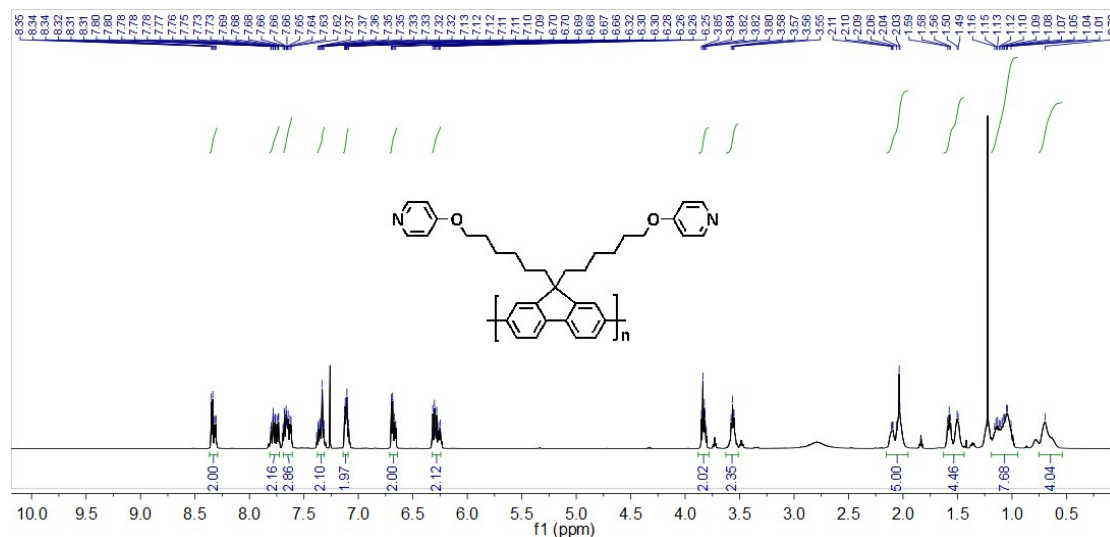

Figure S1. <sup>1</sup>H NMR spectrum of PFPy.



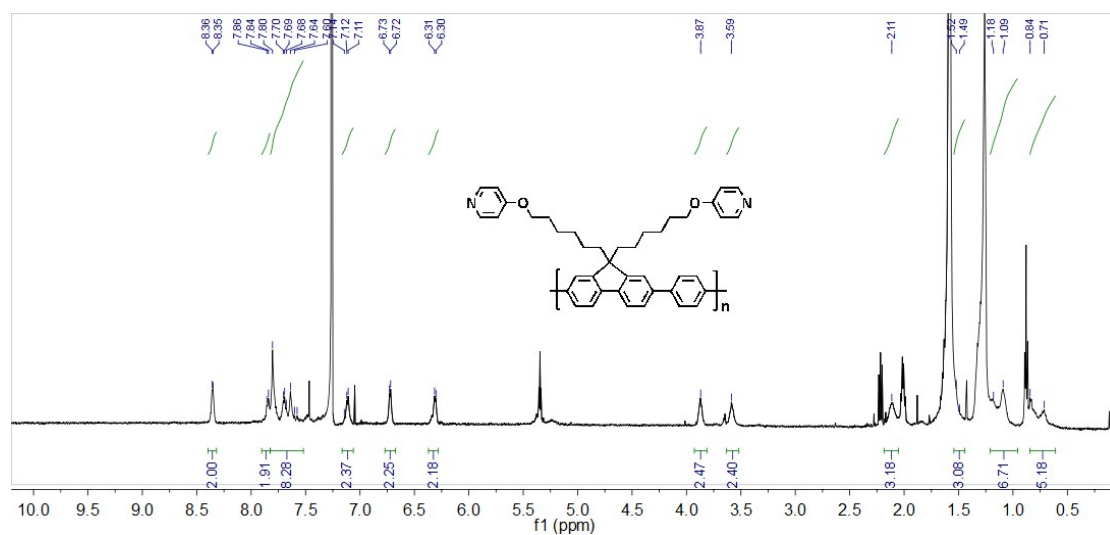

**Figure S4.** <sup>1</sup>H NMR spectrum of PFPy-P.
